# Supplementary material
Source: PubMed Central journal article supplement (PMC4368485)
Supplement: NIHMS662954-supplement-1.pdf [file NIHMS662954-supplement-1.pdf]

## SUPPLEMENTAL INFORMATION

**Supplemental Figure S1**, associated with Table 1 and Figure 1

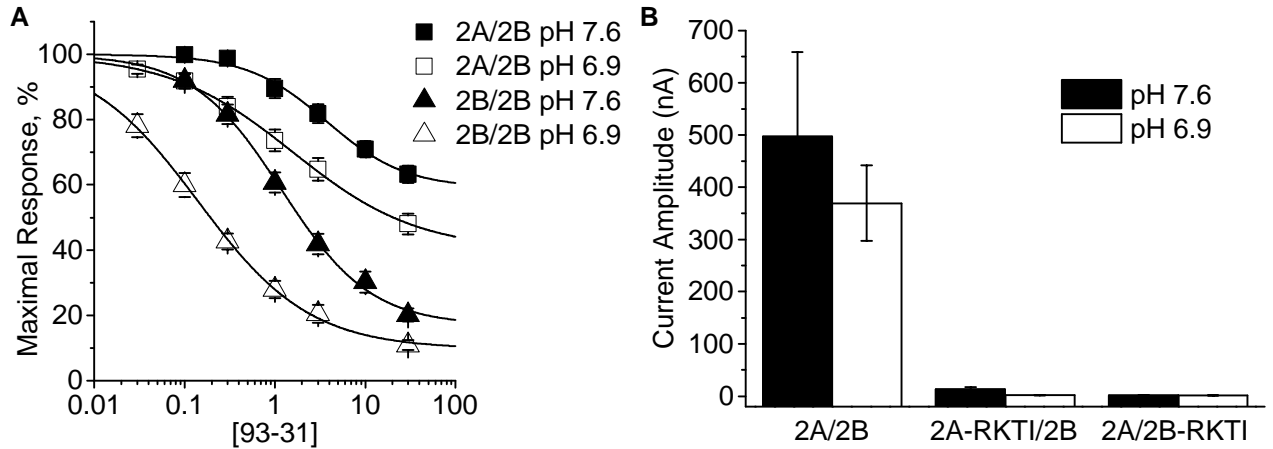

### Proton-sensitive inhibition of triheteromeric GluN1/GluN2A/GluN2B NMDA receptors by 93-31.

**A)** Concentration-response curves for 93-31 were generated for current responses of GluN1/2A/2B\* (2A/2B) and GluN1/2B/2B\* (2B/2B) receptors to maximal concentrations of glutamate and glycine at pH 7.6 and pH 6.9 ( $n=7-10$  oocytes; data represents the mean  $\pm$  SEM). The 93-31  $IC_{50}$  value at pH 6.9 shifted from 0.14  $\mu$ M (90% maximal inhibition,  $n=6$ ) for GluN1/GluN2B/GluN2B\* receptors to 1.6  $\mu$ M (52% maximal inhibition,  $n=10$ ) for GluN1/GluN2A/GluN2B\* receptors. The 93-31  $IC_{50}$  value at pH 7.6 shifted from 1.2  $\mu$ M (80% maximal inhibition,  $n=7$ ) for GluN1/GluN2B/GluN2B\* receptors to 3.7  $\mu$ M (37% maximal inhibition,  $n=10$ ) for GluN1/GluN2A/GluN2B\* receptors. **B)** The amplitude of the current contributed by diheteromeric GluN1/2A/2A\* and GluN1/2B/2B\* receptors that escaped the ER was measured in oocytes expressing GluN1/2A/2B-RKTI\* and GluN1/2A-RKTI/2B\*, respectively (Hansen et al. 2014). Because the RKTI mutations block glutamate binding, the only active NMDA receptors would contain either two copies of GluN2A\* or two copies of GluN2B\* receptors that escape ER retention. The amplitude of GluN1/2A/2B-RKTI\* (pH 7.6:  $1.8 \pm 0.5$  nA, pH 6.9:  $1.4 \pm 0.3$  nA) and GluN1/2A-RKTI/2B\* (pH 7.6:  $13 \pm 4.5$  nA, pH 6.9:  $1.6 \pm 0.8$  nA) current responses were less than 3.5% of GluN1/2A/2B\* current responses (pH 7.6:  $497 \pm 162$  nA, pH 6.9:  $370 \pm 72$  nA).

Supplemental Figure S2, associated with Figure 3

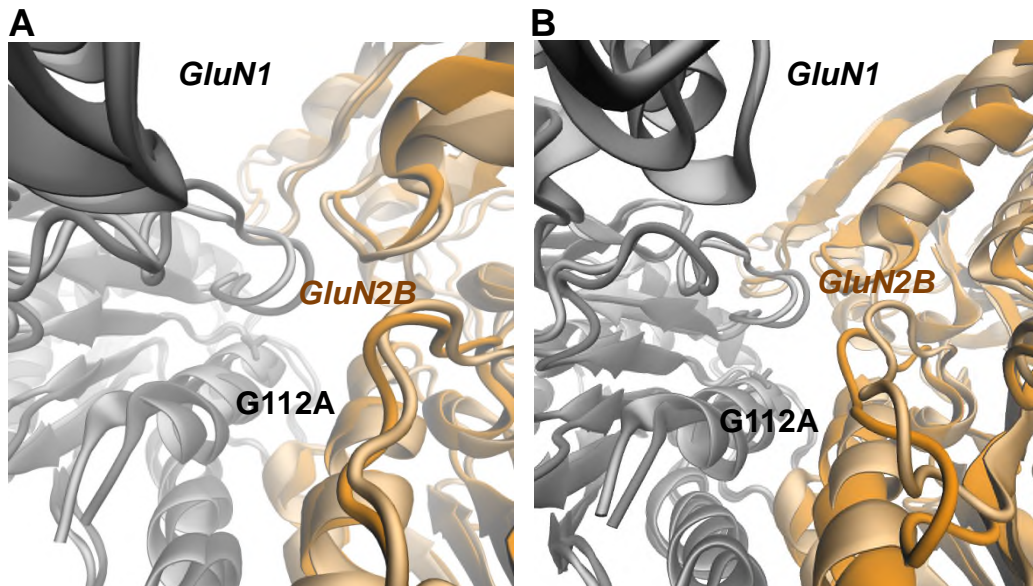

**Molecular dynamics simulation of G112A reveals no significant distortions at the GluN1/GluN2B amino terminal domain interface. A)**

The modeled protein structure at 4.8 ns (dark gray/orange) of molecular dynamics simulation for GluN1/GluN2B(G112A) is superimposed on the 0 ns starting position (light gray/orange). **B)** The modeled structure after 4.8 ns (dark gray/orange) of GluN1/GluN2B(G112A) simulation is superimposed on wild-type GluN1/GluN2B. Molecular modeling was performed using Desmond 3.7 from the Schrödinger Software Suite using default parameters.

Supplemental Figure S3, associated with Figure 4

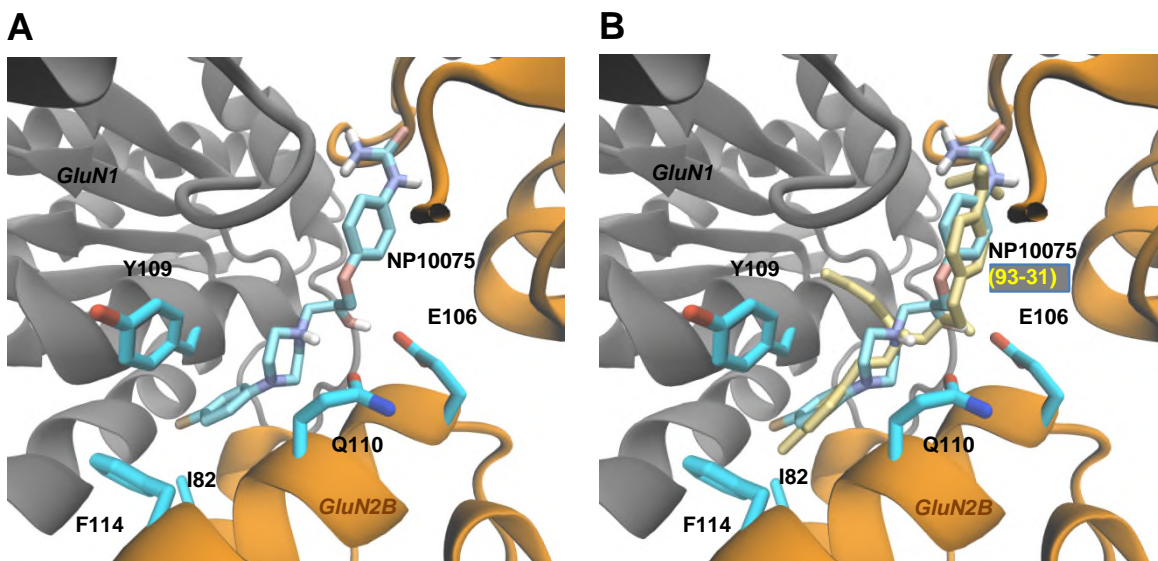

**Induced fit docking of NP10075.** **A)** The hydroxyl group in NP10075 is predicted to be able to interact with Glu106, similar to 93-3.1. **B)** The same pose for NP10075 depicted in **(A)** overlaid with 93-31 (yellow).

Supplemental Figure S4 , associated with Figure 5

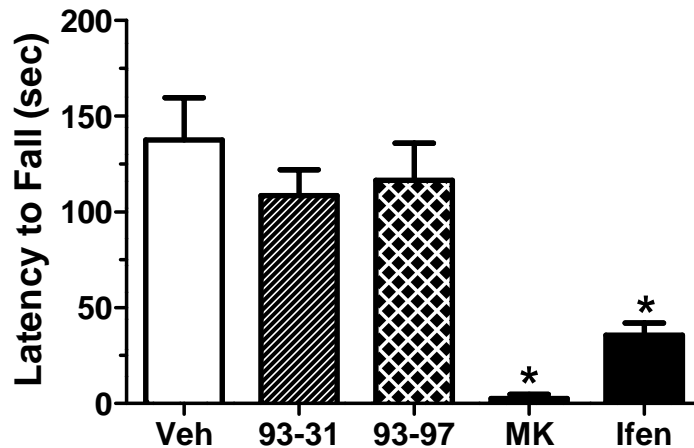

**Effect of 93-31 and 93-97 on mouse rotorod performance.** Adult male C57BL/6 mice (*Methods*) were trained on the rotorod on consecutive days (4 trials/day, 25 min interval; each day 24 hr interval; 2 days). On day 3 mice were randomly assigned to treatment groups and drugs administered IP in a blinded fashion; vehicle (Veh), 30 mg/kg 93-31, 30 mg/kg 93-97, 30 mg/kg ifenprodil (Ifen), or 0.6 mg/kg (+)MK-801 (MK). The four rotorod trials on day 3 (post drug treatment) were averaged for each mouse. The results shown are the mean  $\pm$  SEM per treatment group (n=6 for Veh, 93-31, and 93-97; n=5 for Ifen and MK). One-WAY-ANOVA and Dunnett's test; \*p<0.05 from vehicle.

**Supplemental Table S1**, associated with INTRODUCTION: Literature supporting elevation of glutamate in injured tissue in animal models and human patients.

| Authors                                                                 | Journal                                     | Title                                                                                                                                                                                                    |
|-------------------------------------------------------------------------|---------------------------------------------|----------------------------------------------------------------------------------------------------------------------------------------------------------------------------------------------------------|
| Benveniste, H., Drejer, J., Schousboe, A. & Diemer, N. H.               | J Neurochem 43, 1369–1374 (1984)            | Elevation of the extracellular concentrations of glutamate and aspartate in rat hippocampus during transient cerebral ischemia monitored by intracerebral microdialysis                                  |
| Baethmann, A. et al.                                                    | J. Neurosurg. 70, 578–91 (1989)             | Release of glutamate and of free fatty acids in vasogenic brain edema                                                                                                                                    |
| Choi, D. W. & Rothman, S. M.                                            | Annu. Rev. Neurosci. 13, 171–82 (1990)      | The role of glutamate neurotoxicity in hypoxic-ischemic neuronal death.                                                                                                                                  |
| Nilsson, P., Hillered, L., Ponten, U. & Ungerstedt, U.                  | J Cereb Blood Flow Metab 10, 631–637 (1990) | Changes in cortical extracellular levels of energy-related metabolites and amino acids following concussive brain injury in rats                                                                         |
| Beal, M. F.                                                             | FASEB J 6, 3338–3344 (1992)                 | Mechanisms of excitotoxicity in neurologic diseases                                                                                                                                                      |
| Adachi, H., Fujisawa, H., Maekawa, T., Yamashita, T. & Ito, H.          | Int. J. Hyperthermia 11, 587–99 (1995)      | Changes in the extracellular glutamate concentrations in the rat cortex following localized by hyperthermia                                                                                              |
| Rodríguez-Ithurralde, D., Olivera, S., Vincent, O. & Maruri, A.         | J Neurol Sci 152 Suppl, S54–S61 (1997)      | In vivo and in vitro studies of glycine- and glutamate-evoked acetylcholinesterase release from spinal motor neurones: implications for amyotrophic lateral sclerosis/motor neurone disease pathogenesis |
| Qureshi, A. I. et al.                                                   | Crit Care Med 31, 1482–1489 (2003)          | Extracellular glutamate and other amino acids in experimental intracerebral hemorrhage: an in vivo microdialysis study                                                                                   |
| Kostandy, B. B.                                                         | Neurol Sci 33, 223–237 (2012)               | The role of glutamate in neuronal ischemic injury: the role of spark in fire                                                                                                                             |
| Bondoli, A., Barbi, S., Camaioni, D., Della Morte, F. & Magalini, S. I. | Resuscitation 9, 119–124 (1981)             | Plasma and cerebrospinal fluid free amino acid concentration in post-traumatic cerebral oedema in patients with shock                                                                                    |
| Robertson, C. S. et al.                                                 | J Trauma 28, 1523–1532 (1988)               | Alterations in cerebral availability of metabolic substrates after severe head injury                                                                                                                    |
| Persson, L. & Hillered, L.                                              | J Neurosurg 76, 72–80 (1992)                | Chemical monitoring of neurosurgical intensive care patients using intracerebral microdialysis                                                                                                           |
| Baker, A. J., Moulton, R. J., MacMillan, V. H. & Shedden, P. M.         | J Neurosurg 79, 369–372 (1993)              | Excitatory amino acids in cerebrospinal fluid following traumatic brain injury in humans                                                                                                                 |
| Yamamoto, T. et al.                                                     | Acta Neurochir Suppl 75, 17–19 (1999)       | CSF and ECF glutamate concentrations in head injured patients                                                                                                                                            |
| Srinivasan, R., Sailasuta, N., Hurd, R., Nelson, S. & Pelletier, D.     | Brain 128, 1016–1025 (2005)                 | Evidence of elevated glutamate in multiple sclerosis using magnetic resonance spectroscopy at 3T                                                                                                         |
| Wagner, A. K. et al.                                                    | Crit Care Med 33, 407–413 (2005)            | Gender associations with cerebrospinal fluid glutamate and lactate/pyruvate levels after severe traumatic brain injury                                                                                   |

**Supplemental Table S3**, associated with INTRODUCTION: Clinical literature testing glutamate antagonists in cerebral injury.

| Authors                                                                            | Journal                                  | Title                                                                                                                                                                                        |
|------------------------------------------------------------------------------------|------------------------------------------|----------------------------------------------------------------------------------------------------------------------------------------------------------------------------------------------|
| Grotta, J. et al.                                                                  | Stroke 26, 602–605 (1995)                | Safety and tolerability of the glutamate antagonist CGS 19755 (Selfotel) in patients with acute ischemic stroke. Results of a phase IIa randomized trial                                     |
| Davis, S. M., Albers, G. W., Diener, H. C., Lees, K. R. & Norris, J.               | Lancet 349, 32 (1997)                    | Termination of Acute Stroke Studies Involving Selfotel Treatment. ASSIST Steering Committee                                                                                                  |
| Lees, K. R.                                                                        | Neurology 49, S66–S69 (1997)             | Cerestat and other NMDA antagonists in ischemic stroke                                                                                                                                       |
| Muir KW.                                                                           | Curr Opin Pharmacol 6, 53-60 (2006)      | Glutamate-based therapeutic approaches: clinical trials with NMDA antagonists                                                                                                                |
| Farin A, Marshall LF.                                                              | Acta Neurochir Suppl, 89, 101-107 (2004) | Lessons from epidemiologic studies in clinical trials of traumatic brain injury                                                                                                              |
| Morris, G. F. et al.                                                               | J Neurosurg 91, 737–743 (1999)           | Failure of the competitive N-methyl-D-aspartate antagonist Selfotel (CGS 19755) in the treatment of severe head injury: results of two phase III clinical trials. The Selfotel Investigators |
| The North American Glycine Antagonist in Neuroprotection (GAIN) Investigators.”    | Stroke 31, 358–365 (2000)                | Phase II studies of the glycine antagonist GV150526 in acute stroke: the North American experience. The North American Glycine Antagonist in Neuroprotection (GAIN) Investigators            |
| Albers, G. W., Goldstein, L. B., Hall, D. & Lesko, L. M.                           | JAMA 286, 2673–82 (2001)                 | Aptiganel hydrochloride in acute ischemic stroke: a randomized controlled trial                                                                                                              |
| Sacco, R. L. et al.                                                                | JAMA 285, 1719–1728 (2001)               | Glycine antagonist in neuroprotection for patients with acute stroke: GAIN Americas: a randomized controlled trial                                                                           |
| Ikonomidou, C. & Turski, L.                                                        | Lancet Neurol 1, 383–386 (2002)          | Why did NMDA receptor antagonists fail clinical trials for stroke and traumatic brain injury?                                                                                                |
| Warach, S. et al.                                                                  | Cerebrovasc Dis 21, 106–111 (2006)       | Effect of the Glycine Antagonist Gavestinel on cerebral infarcts in acute stroke patients, a randomized placebo-controlled trial: The GAIN MRI Substudy                                      |
| Yurkewicz, L., Weaver, J., Bullock, M. R. & Marshall, L. F.                        | J Neurotrauma 22, 1428–1443 (2005)       | The effect of the selective NMDA receptor antagonist traxoprodil in the treatment of traumatic brain injury.                                                                                 |
| Lees K.R., Dyker A.G., Sharma A., Ford G.A., Ardron M.E., & Grosset D.G.           | Stroke 32, 466-472 (2001)                | Tolerability of the low-affinity, use-dependent NMDA antagonist AR-R15896AR in stroke patients: a dose-ranging study                                                                         |
| Diener H.C., AlKhedr A., Busse O., Hacke W., Zingmark P.H., Jonsson N., & Basun H. | J Neurol 249, 561-568 (2002)             | Treatment of acute ischaemic stroke with the low-affinity, use-dependent NMDA antagonist AR-R15896AR. A safety and tolerability study                                                        |

**Supplemental Table S4**, associated with Figure 1: pH-dependence of GluN1/GluN2B association rates for 93-31

|                                                         | pH 6.9                   | pH 7.6                    | pH 7.6 / pH 6.9 | N <sup>e</sup> |
|---------------------------------------------------------|--------------------------|---------------------------|-----------------|----------------|
| $k_{ON}$ , M <sup>-1</sup> s <sup>-1</sup> <sup>a</sup> | 0.2141 x 10 <sup>6</sup> | 0.06731 x 10 <sup>6</sup> | 0.31            | 19,20          |
| $k_{OFF}$ , s <sup>-1</sup> <sup>b</sup>                | 0.1084±0.002             | 0.3514±0.002              | 3.24            | 15,9           |
| $K_D$ , nM <sup>c</sup>                                 | 506                      | 5220                      | 10.3            | --             |
| IC <sub>50</sub> , nM (HEK cells) <sup>d</sup>          | 40                       | 360                       | 9.0             | 4-6            |

<sup>a</sup>  $k_{ON}$  was determined from the slope of the linear regression for the composite plot of  $1 / \tau_{ONSET}$  of inhibition against 93-31 concentration (see *Results* and Fig 1d in the main text).

<sup>b</sup>  $k_{OFF}$  was determined from the y-intercept of the linear regression for the composite plot of  $1 / \tau_{ONSET}$  of inhibition against 93-31 concentration (see *Results* and Fig 1d in the main text).

<sup>c</sup>  $K_D$  was calculated from  $k_{OFF} / k_{ON}$ .

<sup>d</sup> IC<sub>50</sub> values in HEK cells were from Figure 1b.

<sup>e</sup> N is the number of independent HEK cells tested (pH 6.9, pH 7.6). All experiments were performed in maximally-effective concentration of glutamate (100 μM) and glycine (30 μM) on rat GluN1/GluN2B receptors.

**Supplemental Table S5**, associated with Figure 5: Pharmacokinetics of 93-31 in rodents.

| Species <sup>a</sup> | Route <sup>b</sup> | Dose (mg/kg) | Cmax <sup>c</sup> (ng/mL)N | Tmax (hr) | AUC <sub>inf</sub> (hr*ng/mL) | T <sub>1/2</sub> (hr) | Brain: Plasma Ratio (N) | Study <sup>d</sup> |
|----------------------|--------------------|--------------|----------------------------|-----------|-------------------------------|-----------------------|-------------------------|--------------------|
| Mouse                | IP                 | 1            | 165 ± 34 (3)               | 0.08      | 203                           | 0.7                   | -                       | A                  |
| Mouse                | IP                 | 3            | 592 ± 15 (3)               | 0.08      | 674                           | 1.0                   | -                       | A                  |
| Rat                  | IV                 | 4            | 590 ± 50 (3)               | 0.08      | 514                           | 0.9                   | 1.2 ± 0.2 (9)           | B                  |
| Rat                  | IV                 | 10           | 2577 ± 196 (3)             | 0.08      | 2188                          | 1.4                   | -                       | C                  |

<sup>a</sup> Mouse strain was C57BL/6. Rat strain was Sprague-Dawley.

<sup>b</sup> Route of drug administration: intraperitoneal, IP; intravenous, IV.

<sup>c</sup> Data shown are from a minimum of n=3 per data point. Mean ± SEM.

<sup>d</sup> Study A formulation was 1:1 DMSO:saline. Study B and C formulation was 2% dimethylacetamide: 98% (2-hydroxypropyl)-β-cyclodextrin (5% in water).



**Supplemental Table S6**, associated with DISCUSSION and Table 1: pH dependence of known NMDAR antagonists at recombinant GluN1/GluN2B.

| Drug                       | pKa <sup>a</sup>      | Fold increase in ionized species <sup>b</sup> | IC <sub>50</sub> pH 6.9 <sup>c</sup><br>μM (N) | IC <sub>50</sub> pH 7.6 <sup>c</sup><br>μM (N) | IC <sub>50</sub> (7.6) / IC <sub>50</sub> (6.9) |
|----------------------------|-----------------------|-----------------------------------------------|------------------------------------------------|------------------------------------------------|-------------------------------------------------|
| Ifenprodil <sup>d</sup>    | 9.5                   | 1.0                                           | 0.075 (39)                                     | 0.13 (33)                                      | 1.7                                             |
| Eliprodil <sup>d</sup>     | 8.4                   | 1.1                                           | 0.23 (43)                                      | 0.88 (49)                                      | 3.8                                             |
| CP-101,606 <sup>d</sup>    | 8.8                   | 1.1                                           | 0.021 (42)                                     | 0.014 (44)                                     | 0.7                                             |
| Radiprodil <sup>d</sup>    | 9.2                   | 1.0                                           | 0.006 (25)                                     | 0.011 (42)                                     | 1.8                                             |
| Ro 8-4304 <sup>d</sup>     | 7.5                   | 1.8                                           | 0.58 (20)                                      | 1.40 (12)                                      | 2.4                                             |
| Ro 25-6981 <sup>d</sup>    | 9.4                   | 1.0                                           | 0.013 (38)                                     | 0.012 (36)                                     | 0.9                                             |
| Ro 63-1908 <sup>d</sup>    | 8.7                   | 1.1                                           | 0.047 (10)                                     | 0.21 (9)                                       | 4.6                                             |
| Haloperidol                | 8.0                   | 1.3                                           | 2.7 (32)                                       | 9.6 (30)                                       | 3.6                                             |
| Compound 52 <sup>d,e</sup> | 8.0                   | 1.3                                           | 0.015 (24)                                     | 0.065 (26)                                     | 4.3                                             |
| Clobenpropit               | 7.3, 7.6              | 1.1                                           | 0.55 (8)                                       | 0.80 (9)                                       | 1.5                                             |
| Iodophenpropit             | 7.3, 8.3              | 1.3                                           | 0.33 (10)                                      | 1.1 (10)                                       | 3.3                                             |
| NP10075 <sup>d,f</sup>     | 6.9, 2.8 <sup>g</sup> | 3.0                                           | 0.045 <sup>f</sup>                             | 0.43 <sup>f</sup>                              | 9.1 <sup>f</sup>                                |

<sup>a</sup> The pKa of the chain nitrogen was calculated using ACD/pKa DB 12.00, [www.acdlabs.com](http://www.acdlabs.com).

<sup>b</sup> The fold change in ionized species at pH values 6.9 and 7.6 were calculated as the ratio of the dominant mono-cationic species at the two pH values, as described in Table 1.

<sup>c</sup> IC<sub>50</sub> values for inhibition of GluN1/GluN2B expressed in *Xenopus* oocytes were determined as described in the *Methods* from composite inhibition curves at different pH values. pH has minimal effects on EC<sub>50</sub> values for either glutamate or glycine (Traynelis et al 1995). The number of oocytes (N) recorded is shown in parentheses.

<sup>d</sup> Data from human GluN1 and human GluN2B.

<sup>e</sup> Compound 52 is from Mosley et al. 2009.

<sup>f</sup> Data reported by Wang et al. 2014 are included for comparison.

<sup>g</sup> Predicted pKa values for piperazine nitrogens distal and proximal to the adjacent phenyl ring; predicted pKa values for the urea nitrogens were above 11 and are not given. Ionization was calculated for distal nitrogen.

## SUPPLEMENTAL EXPERIMENTAL PROCEDURES

### *HEK cell preparation and transfection*

HEK 293 cells (CRL 1573; ATCC, Rockville, MD; hereafter HEK cells) were plated onto glass coverslips (5 mm diameter, Warner Instruments, Hamden, CT) coated with 0.1 mg/ml poly-D-lysine. HEK cells were maintained in 5% humidified CO<sub>2</sub> at 37°C in DMEM (Dulbecco's Modified Eagle Medium, Cat. No. 11960; Invitrogen) supplemented with 10% fetal bovine serum, 10 units/ml penicillin, and 10 µg/ml streptomycin. HEK cells were transiently transfected using the Fugene 6 transfection reagent (Roche Diagnostics, Indianapolis, IN) with cDNAs encoding green fluorescent protein (GFP), GluN1-1a, and GluN2B at a ratio of 1:1:1 and 0.5 µg/well total cDNA for 16-24 hours before whole cell voltage-clamp recordings. Following transfection, cells were incubated in media supplemented with NMDAR antagonists D,L-2-amino-5-phosphonovalerate (D,L-APV, 200 µM) and 7-chlorokynurenic acid (7-CKA, 200 µM).

### *Triheteromeric GluN1/GluN2A/GluN2B receptors*

The GluN2A and GluN2B subunits were fused to C-terminal peptides (C1 or C2) containing the GABA<sub>B1</sub> (C1) or GABA<sub>B2</sub> (C2) coiled-coil domains and a dilysine ER retention sequence. The C1 and C2 tags form a coiled-coil structure that masks the ER retention signal, thus allowing selective surface expression of tetramers containing one C1-tagged subunit and one C2-tagged subunit. Oocytes were injected with cRNA encoding GluN1-1a, GluN2A<sub>C2</sub> and GluN2B<sub>C1</sub>, or GluN1, GluN2B<sub>C1</sub> and GluN2B<sub>C2</sub> (referred to as GluN1/2A/2B\* and GluN1/2B/2B\* in Figure S1). The mutated subunits used in Figure S1B were GluN2A-R518K + T690I<sub>C2</sub> and GluN2B-R519K + T691I<sub>C1</sub> (referred to as GluN2A-RKTI\* and GluN2B-RKTI\*).

### *Pharmacokinetics in rodents*

Sprague-Dawley rats were dosed with either 4 or 10 mg/kg IV for plasma pharmacokinetics, formulated in 2% dimethylacetamide: 98% (2-hydroxypropyl)-β-cyclodextrin (5% in water). Animals were fasted overnight prior to dosing, and food returned to the animals two hours after dosing. Blood and brain tissue samples were collected at regular time intervals (n=3 at each time). Plasma samples were prepared immediately after collection by centrifugation for ten minutes, and the supernatant stored below -20°C. Brain tissue was weighed, homogenized on ice in 50 mM K-phosphate buffer and the homogenate was stored below -20°C until analysis. Plasma and brain homogenate samples were extracted by the addition of 5 volumes of cold acetonitrile, mixed well by vortexing and centrifuged at 4000 rpm for 15 minutes. The supernatant fractions were analyzed by LC-MS/MS operating in multiple reaction monitor mode (MRM). The amount of parent compound in each sample was calculated by comparing the response of the analyte in the sample to that of a standard curve (Ricerca, OH). C57BL/6 mice were dosed at 1 and 3 mg/kg (50% DMSO: 50% saline) by IP and plasma samples collected over a 24 hr period and prepared similar as above (Davos, NJ) to determine plasma pharmacokinetic endpoints.
